# Supplementary material for: Genetic Mutations That Confer Fluoride Resistance Modify Gene Expression and Virulence Traits of Streptococcus mutans
Source: MDPI journal article supplement (doi:10.3390/microorganisms9040849), 2021-04-15
Supplement: s1 [file s1]

# Supplementary Materials

## Genetic mutations that confer fluoride resistance modify gene expression and virulence traits of *Streptococcus mutans*

Hyeon-Jeong Lee<sup>1</sup>, Jihee Song<sup>2</sup> and Jeong Nam Kim<sup>1,3\*</sup>

<sup>1</sup> Department of Integrated Biological Science, College of Natural Sciences, Pusan National University, Busan 46241, Korea

<sup>2</sup> Department of Family, Youth, and Community Sciences, University of Florida, Gainesville, FL 32611, USA

<sup>3</sup> Department of Microbiology, College of Natural Sciences, Pusan National University, Busan 46241, Korea

\* Correspondence: kimjn@pusan.ac.kr; Tel.: +82-51-510-2269

**Table S1.** Oligonucleotides used in this study.

| Target gene      | Orientation | Sequence (5' to 3')      |
|------------------|-------------|--------------------------|
| 16S rRNA         | Forward     | CTTACCAGGTCTTGACATCCCG   |
|                  | Reverse     | ACCCAACATCTCACGACACGAG   |
| <i>glpF</i>      | Forward     | CTACTGGACCTGCCCTTAATC    |
|                  | Reverse     | GAATACCACCACTTTGAGTTACC  |
| <i>hsdS</i>      | Forward     | TGGGAAGTGACAATTTGGGATA   |
|                  | Reverse     | CTGAGACCACCATTGAGAGAG    |
| <i>pykF</i>      | Forward     | GGTAGAAATCCGTGGTGGTAAA   |
|                  | Reverse     | ACATTGGCTCCTTCTGTAATCA   |
| <i>SMU.1289c</i> | Forward     | GCCCATGGCAGCTATACTATT    |
|                  | Reverse     | TGAGAGGTCAAACCTAGCCGTA   |
| <i>SMU.1290c</i> | Forward     | AGGGCTGAGTACTGATTTGGTT   |
|                  | Reverse     | CGCCTTGATAACCTGCTGATA    |
| <i>murC2</i>     | Forward     | CTGTCCTTCTCAATGCCAATTATG |
|                  | Reverse     | CGGACACCACCTGTAAAGATT    |
| <i>SMU 2059c</i> | Forward     | CATCCTTACCCATTATCGTAGCA  |
|                  | Reverse     | AGAACCGACTCCAACCAAAG     |

**Table S2.** Up-regulated genes in the FR strain ( $P < 0.01$ ).

| Gene name                                              | Fold change<br>(Log2 value) | Description                                                                 |
|--------------------------------------------------------|-----------------------------|-----------------------------------------------------------------------------|
| <i>SMU.1367c (ubiE)</i>                                | 6.657                       | conserved hypothetical protein                                              |
| <i>SMU.932</i>                                         | 4.154                       | hypothetical protein                                                        |
| <i>SMU.935</i>                                         | 4.138                       | putative amino acid ABC transporter, permease protein                       |
| <i>SMU.934</i>                                         | 4.011                       | putative amino acid ABC transporter, permease protein                       |
| <i>SMU.933</i>                                         | 3.916                       | putative amino acid ABC transporter, periplasmic amino acid-binding protein |
| <i>SMU.936</i>                                         | 3.869                       | putative amino acid ABC transporter, ATP-binding protein                    |
| <i>SMU.1341c, SMU.1340 (bacA2)</i>                     | 2.930                       | putative gramicidin S synthetase / putative surfactin synthetase            |
| <i>SMU.1339 (bacD)</i>                                 | 2.918                       | putative bacitracin synthetase                                              |
| <i>SMU.1342 (bacA1)</i>                                | 2.846                       | putative bacitracin synthetase 1                                            |
| <i>SMU.1343c</i>                                       | 2.714                       | putative polyketide synthase                                                |
| <i>SMU.1568 (malX)</i>                                 | 2.659                       | putative maltose/maltodextrin ABC transporter, sugar-binding protein        |
| <i>SMU.1898, SMU.1899</i>                              | 2.594                       | putative ABC transporter, ATP-binding and permease protein                  |
| <i>SMU.1345c</i>                                       | 2.455                       | putative peptide synthetase similar to MycA                                 |
| <i>SMU.503c</i>                                        | 2.353                       | hypothetical protein                                                        |
| <i>SMU.651c</i>                                        | 2.351                       | putative ABC transporter, substrate-binding protein                         |
| <i>SMU.1344c</i>                                       | 2.302                       | putative malonyl-CoA-acyl-carrier-protein transacylase                      |
| <i>SMU.1289c (permease_B, eriC1b)</i>                  | 2.299                       | putative permease, chloride channel                                         |
| <i>SMU.1336 (pksD)</i>                                 | 2.261                       | conserved hypothetical protein, involved in polyketide synthesis            |
| <i>SMU.962</i>                                         | 2.260                       | putative dehydrogenase                                                      |
| <i>SMU.961</i>                                         | 2.232                       | conserved hypothetical protein                                              |
| <i>SMU.609</i>                                         | 2.199                       | putative 40K cell wall protein precursor                                    |
| <i>SMU.1564 (glgP), smu.1565 (malQ)</i>                | 2.147                       | putative glycogen phosphorylase / putative 4-alpha-glucanotransferase       |
| <i>SMU.1293c</i>                                       | 2.134                       | conserved hypothetical protein                                              |
| <i>SMU.1290c (permease_A, eriC1a), SMU.1291c (mut)</i> | 1.984                       | putative permease, chloride channel / putative chorismate mutase            |
| <i>SMU.1292c</i>                                       | 1.967                       | conserved hypothetical protein                                              |
| <i>SMU.1184c</i>                                       | 1.939                       | putative transcriptional regulator, antiterminator                          |

|                                                       |       |                                                                                                                                     |
|-------------------------------------------------------|-------|-------------------------------------------------------------------------------------------------------------------------------------|
| SMU.652c,<br>SMU.653c                                 | 1.930 | putative ABC transporter, ATP-binding protein,<br>possible nitrate transport system / putative ABC<br>transporter, permease protein |
| SMU.1569 ( <i>malF</i> ),<br>SMU.1570 ( <i>malG</i> ) | 1.927 | putative maltose/maltodextrin ABC transporter,<br>permease protein                                                                  |
| SMU.1335c                                             | 1.926 | putative enoyl-(acyl-carrier-protein) reductase                                                                                     |
| SMU.1575c,<br>SMU.1576c                               | 1.923 | hypothetical protein                                                                                                                |
| SMU.1183 ( <i>mtlA2</i> )                             | 1.900 | PTS system, mannitol-specific enzyme IIA                                                                                            |
| SMU.1157c                                             | 1.865 | conserved hypothetical protein                                                                                                      |
| SMU.984                                               | 1.827 | hypothetical protein                                                                                                                |
| SMU.1337c                                             | 1.820 | putative alpha/beta superfamily hydrolase                                                                                           |
| SMU.1347c,<br>SMU.1346 ( <i>bacT</i> )                | 1.800 | conserved hypothetical protein, possible permease /<br>putative thioesterase                                                        |
| SMU.840c                                              | 1.789 | hypothetical protein                                                                                                                |
| SMU.1160c                                             | 1.725 | hypothetical protein                                                                                                                |
| SMU.877 ( <i>agaL</i> )                               | 1.720 | alpha-galactosidase                                                                                                                 |
| SMU.43                                                | 1.715 | putative site-specific DNA-methyltransferase<br>restriction-modification protein                                                    |
| SMU.1650 ( <i>end3</i> )                              | 1.704 | putative endonuclease III (DNA repair)                                                                                              |
| SMU.1365c                                             | 1.685 | hypothetical protein, possible permease                                                                                             |
| SMU.1048                                              | 1.680 | conserved hypothetical protein                                                                                                      |
| SMU.930c                                              | 1.661 | putative transcriptional regulator                                                                                                  |
| SMU.1287                                              | 1.645 | putative transcriptional regulator                                                                                                  |
| SMU.1295 ( <i>add</i> )                               | 1.645 | putative adenosine deaminase                                                                                                        |
| SMU.1182 ( <i>mtlD</i> )                              | 1.610 | mannitol-1-phosphate dehydrogenase                                                                                                  |
| SMU.1571                                              | 1.586 | putative ABC transporter, ATP-binding protein                                                                                       |
| SMU.1577c                                             | 1.579 | conserved hypothetical protein                                                                                                      |
| SMU.1334 ( <i>sfp</i> )                               | 1.569 | putative phosphopantetheinyl transferase                                                                                            |
| SMU.878 ( <i>msmE</i> )                               | 1.566 | multiple sugar-binding ABC transporter, sugar-<br>binding protein precursor                                                         |
| SMU.605                                               | 1.564 | hypothetical protein                                                                                                                |
| SMU.1771c,<br>SMU.1772c,<br>SMU.1773c                 | 1.519 | hypothetical protein                                                                                                                |
| SMU.895,<br>SMU.896                                   | 1.505 | possible DNA-damage-inducible protein / conserved<br>hypothetical protein                                                           |
| SMU.44                                                | 1.490 | possible DNA mismatch repair protein                                                                                                |
| SMU.431                                               | 1.450 | putative ABC transporter, ATP-binding protein                                                                                       |
| SMU.1069c,<br>SMU.1070c                               | 1.445 | hypothetical protein / conserved hypothecial protein                                                                                |

|                             |       |                                                                                            |
|-----------------------------|-------|--------------------------------------------------------------------------------------------|
| <i>SMU.879 (msmF)</i>       | 1.429 | multiple sugar-binding ABC transporter, permease protein                                   |
| <i>SMU.684, SMU.685</i>     | 1.423 | hypothetical protein                                                                       |
| <i>SMU.1338c</i>            | 1.403 | putative permease, possible multidrug-efflux transporter                                   |
| <i>SMU.1067c, SMU.1068c</i> | 1.380 | putative ABC transporter, permease protein / putative ABC transporter, ATP-binding protein |
| <i>SMU.432</i>              | 1.372 | putative ABC transporter, integral membrane protein                                        |
| <i>SMU.985 (bglA)</i>       | 1.368 | putative beta-glucosidase                                                                  |
| <i>SMU.45</i>               | 1.351 | hypothetical protein                                                                       |
| <i>SMU.986c</i>             | 1.350 | hypothetical protein                                                                       |
| <i>SMU.880 (msmG)</i>       | 1.335 | multiple sugar-binding ABC transporter, permease protein                                   |
| <i>SMU.510c</i>             | 1.335 | hypothetical protein                                                                       |
| <i>SMU.876 (msmR)</i>       | 1.327 | putative MSM operon regulatory protein                                                     |
| <i>SMU.1185 (mtlA1)</i>     | 1.322 | PTS system, mannitol-specific enzyme IIBC component                                        |
| <i>SMU.1294 (flaW)</i>      | 1.317 | putative flabodoxin                                                                        |
| <i>SMU.1288 (rl19)</i>      | 1.306 | 50S ribosomal protein L19                                                                  |
| <i>SMU.1052</i>             | 1.293 | conserved hypothetical protein                                                             |
| <i>SMU.1574c</i>            | 1.218 | conserved hypothetical protein                                                             |
| <i>SMU.560c</i>             | 1.204 | conserved hypothetical protein                                                             |
| <i>SMU.897</i>              | 1.200 | putative type I restriction-modification system, helicase subunit                          |
| <i>SMU.998</i>              | 1.200 | putative ABC transporter, periplasmic ferrichrome-binding protein                          |
| <i>SMU.2027</i>             | 1.199 | putative transcriptional regulator                                                         |
| <i>SMU.1000, SMU.999</i>    | 1.191 | hypothetical protein                                                                       |
| <i>SMU.561c</i>             | 1.183 | putative hydrolase                                                                         |
| <i>SMU.136c</i>             | 1.183 | putative transcriptional regulator                                                         |
| <i>SMU.1366c</i>            | 1.177 | putative ABC transporter, ATP-binding protein                                              |
| <i>SMU.1126 (coaA)</i>      | 1.175 | putative pantothenate kinase                                                               |
| <i>SMU.46, SMU.47</i>       | 1.172 | hypothetical protein                                                                       |
| <i>SMU.1161c</i>            | 1.171 | hypothetical protein                                                                       |
| <i>SMU.1348c</i>            | 1.171 | putative ABC transporter, ATP-binding protein                                              |
| <i>SMU.2165</i>             | 1.164 | putative SpoJ                                                                              |
| <i>SMU.704c</i>             | 1.154 | putative autolysin, amidase                                                                |
| <i>SMU.1402c</i>            | 1.150 | conserved hypothetical protein                                                             |
| <i>SMU.1404c,</i>           | 1.138 | conserved hypothetical protein                                                             |

|                                                              |       |                                                         |
|--------------------------------------------------------------|-------|---------------------------------------------------------|
| <i>SMU.1405c</i>                                             |       |                                                         |
| <i>SMU.2047 (ptsG)</i>                                       | 1.129 | putative PTS system, glucose-specific IIABC component   |
| <i>SMU.1037c</i> ,<br><i>SMU.1038c</i>                       | 1.129 | putative histidine kinase / putative response regulator |
| <i>SMU.2046c</i>                                             | 1.128 | conserved hypothetical protein                          |
| <i>SMU.606</i>                                               | 1.126 | hypothetical protein                                    |
| <i>SMU.287</i>                                               | 1.100 | putative ComB                                           |
| <i>SMU.1942c</i>                                             | 1.092 | putative amino acid binding protein                     |
| <i>SMU.1761c</i> ,<br><i>SMU.1762c</i> ,<br><i>SMU.1763c</i> | 1.079 | conserved hypothetical protein                          |
| <i>SMU.1442c</i>                                             | 1.056 | conserved hypothetical protein                          |
| <i>SMU.1941 (atmB)</i>                                       | 1.048 | putative membrane lipoprotein                           |
| <i>SMU.768c</i>                                              | 1.046 | conserved hypothetical protein                          |
| <i>SMU.881 (gtfA)</i>                                        | 1.044 | sucrose phosphorylase                                   |
| <i>SMU.2153c</i>                                             | 1.034 | putative peptidase                                      |
| <i>SMU.1107c</i>                                             | 1.024 | conserved hypothetical protein                          |
| <i>SMU.804</i>                                               | 1.015 | hypothetical protein                                    |
| <i>SMU.1125c</i>                                             | 1.011 | conserved hypothetical protein                          |
| <i>SMU.1116c</i>                                             | 1.006 | hypothetical protein                                    |
| <i>SMU.1764c</i>                                             | 1.002 | conserved hypothetical protein                          |
| <i>SMU.682</i>                                               | 1.000 | hypothetical protein                                    |

**Table S3.** Down-regulated genes in the FR strain ( $P < 0.01$ ).

| Gene name                                       | Fold change<br>(Log2 value) | Description                                                                                                                                                              |
|-------------------------------------------------|-----------------------------|--------------------------------------------------------------------------------------------------------------------------------------------------------------------------|
| <i>SMU.182 (sloA),<br/>SMU.183 (sloB)</i>       | -1.078                      | putative ABC transporter, ATP-binding protein /<br>putative Mn/Zn ABC transporter                                                                                        |
| <i>SMU.564</i>                                  | -1.151                      | conserved hypothetical protein                                                                                                                                           |
| <i>SMU.423</i>                                  | -1.288                      | hypothetical protein                                                                                                                                                     |
| <i>SMU.1774c</i>                                | -1.296                      | conserved hypothetical protein                                                                                                                                           |
| <i>SMU.278</i>                                  | -1.321                      | hypothetical protein                                                                                                                                                     |
| <i>SMU.1877 (ptnA,<br/>manL)</i>                | -1.399                      | putative PTS system, mannose-specific component<br>IIB                                                                                                                   |
| <i>SMU.1967 (ssb2)</i>                          | -1.409                      | putative single-stranded DNA-binding protein                                                                                                                             |
| <i>SMU.1879 (manN)</i>                          | -1.427                      | putative PTS system, mannose-specific component<br>IID                                                                                                                   |
| <i>SMU.1878 (ptnC,<br/>manM)</i>                | -1.445                      | putative PTS system, mannose-specific component<br>IIC                                                                                                                   |
| <i>SMU.1397c</i>                                | -1.593                      | conserved hypothetical protein                                                                                                                                           |
| <i>SMU.870,<br/>SMU.872,<br/>SMU.871 (pfkB)</i> | -1.724                      | putative transcriptional regulator of sugar<br>metabolism / putative PTS system, fructose-specific<br>enzyme IIAABC component / putative fructose-1-<br>phosphate kinase |
| <i>SMU.2146c</i>                                | -1.777                      | hypothetical protein                                                                                                                                                     |
| <i>SMU.1960c</i>                                | -1.839                      | putative PTS system, mannose-specific IIB<br>component                                                                                                                   |
| <i>SMU.1961c (manX)</i>                         | -1.880                      | putative PTS system, sugar-specific enzyme IIA<br>component                                                                                                              |
| <i>SMU.1958c (manY)</i>                         | -2.000                      | putative PTS system, mannose-specific IIC<br>component                                                                                                                   |
| <i>SMU.1956c</i>                                | -2.115                      | hypothetical protein                                                                                                                                                     |
| <i>SMU.1957 (manZ)</i>                          | -2.182                      | putative PTS system, mannose-specific IID<br>component                                                                                                                   |
| <i>SMU.141</i>                                  | -3.567                      | conserved hypothetical protein                                                                                                                                           |
| <i>SMU.140</i>                                  | -3.779                      | putative glutathion reductase                                                                                                                                            |
| <i>SMU.138</i>                                  | -3.797                      | putative malate permease                                                                                                                                                 |
| <i>SMU.139</i>                                  | -3.896                      | conserved hypothetical protein                                                                                                                                           |
| <i>SMU.137 (mleS)</i>                           | -4.084                      | malolactic enzyme                                                                                                                                                        |

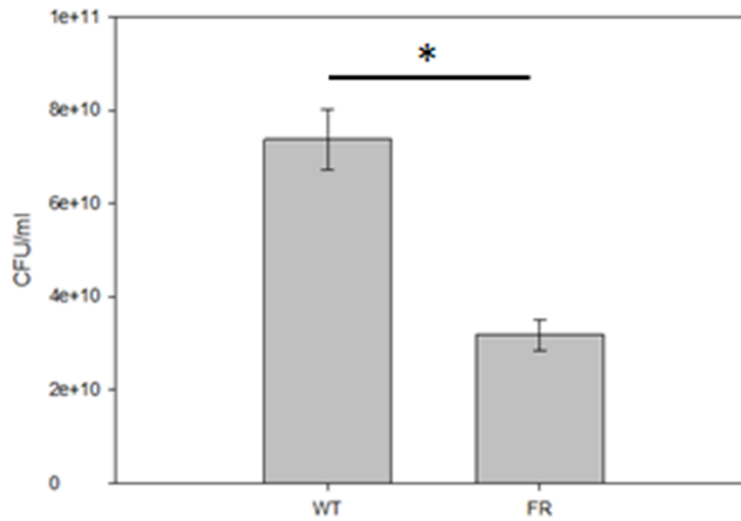

Figure S1. CFU measurement of *S. mutans* wild-type and FR strains. Early exponential cultures grown in BHI medium were diluted 1:100 in a semi-defined biofilm medium (BM). Following 24 h of incubation at 37 °C in a 5% CO<sub>2</sub> aerobic atmosphere, serial dilutions of transformants were plated on BHI medium to determine colony forming units (CFUs). The results are expressed as means of triplicates of three independent isolates. \*, differs from the wild-type strain at  $P < 0.05$ .

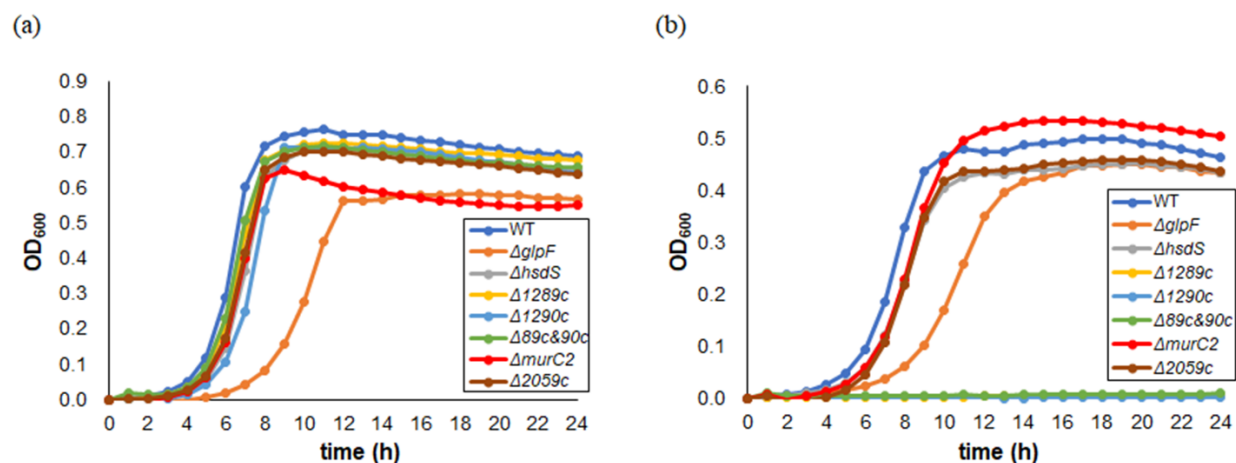

Figure S2. Growth behaviors of *S. mutans* wild-type and mutant strains obtained during growth in BHI medium. The eight strains, wild-type,  $\Delta glpF$ ,  $\Delta hsdS$ ,  $\Delta SMU.1289c$ ,  $\Delta SMU.1290c$ ,  $\Delta SMU.1289c\&1290c$ ,  $\Delta murC2$  and  $\Delta SMU.2059c$  were grown at 37 °C (a) without NaF under 5% CO<sub>2</sub> conditions or (b) with 100 µg mL<sup>-1</sup> NaF. Optical density at 600 nm (OD<sub>600</sub>) was monitored every 1 h at 37 °C using the Bioscreen C Lab System. The results are expressed as means of triplicates of three independent isolates.
